# Supplementary material for: Tamoxifen-predictive value of gene expression signatures in premenopausal breast cancer: data from the randomized SBII:2 trial
Source: Springer Nature journal article supplement (doi:10.1186/s13058-023-01719-z), 2023-09-29

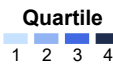

**All ER+ HER2- tumors**

**Control - ER+ HER2- tumors**

**Tam treated - ER+ HER2- tumors**

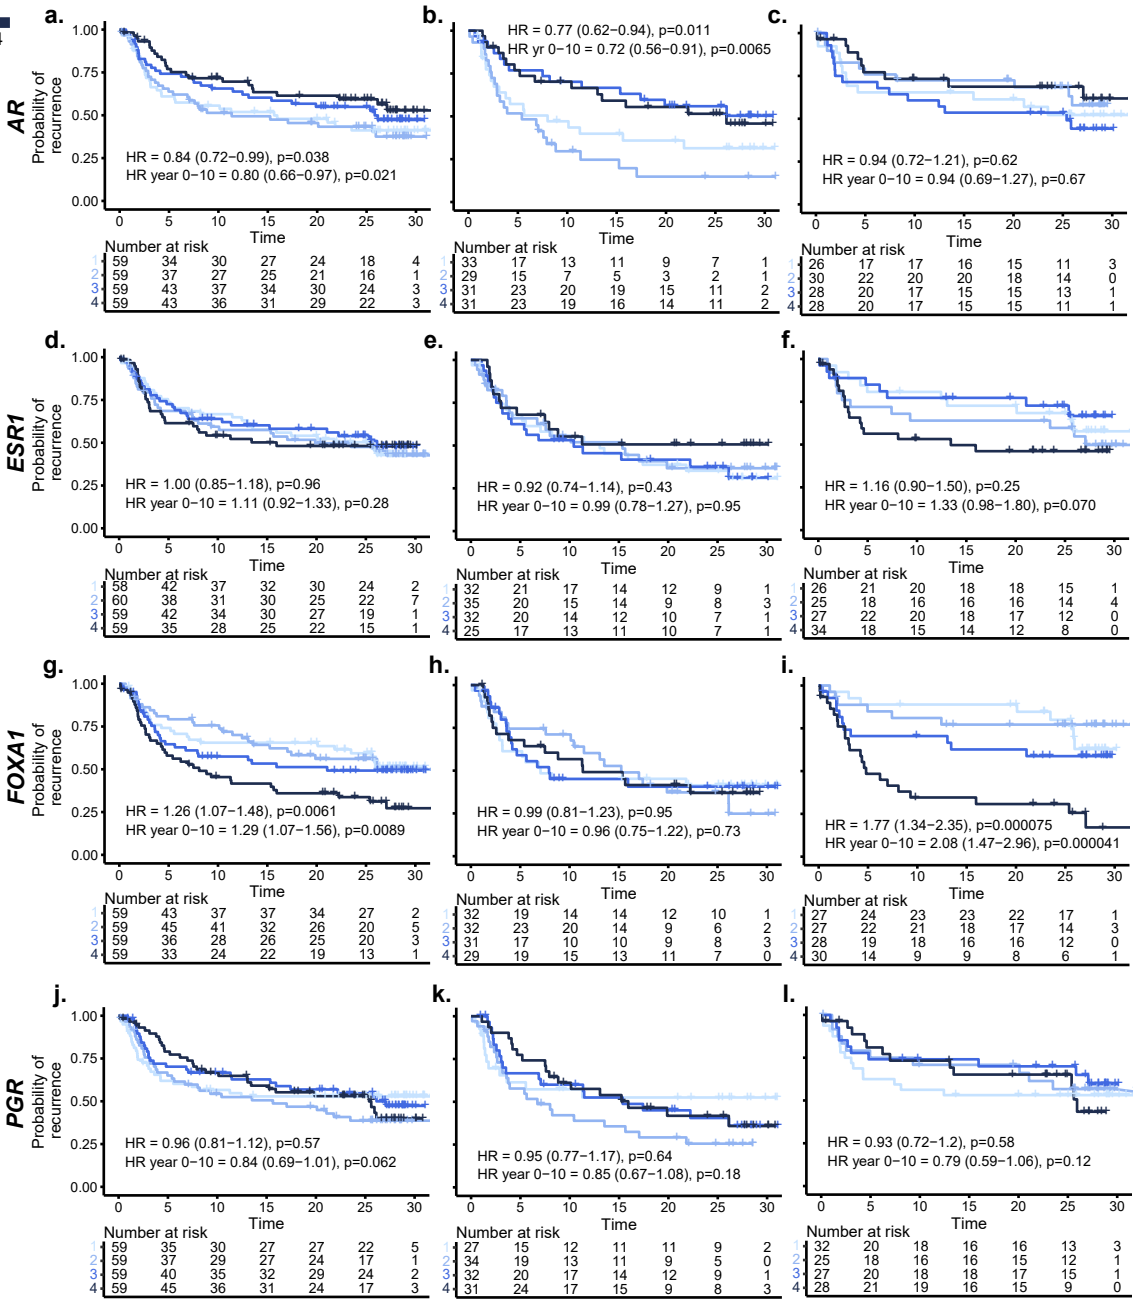

Supplement: MOESM4 [file 26105664]
